# Supplementary material for: Programmed cell death ligand 1 (PD-L1) blockade attenuates metastatic colon cancer growth in cAMP-response element-binding protein (CREB)-binding protein (CBP)/β-catenin inhibitor-treated livers
Source: PubMed Central journal article supplement (PMC6508964; doi:10.18632/oncotarget.26892), 2019-04-30
Supplement: oncotarget-10-3013-s001.pdf [file oncotarget-10-3013-s001.pdf]

## Programmed cell death ligand 1 (PD-L1) blockade attenuates metastatic colon cancer growth in cAMP-response element-binding protein (CREB)-binding protein (CBP)/ $\beta$ -catenin inhibitor-treated livers

### SUPPLEMENTARY MATERIALS

A

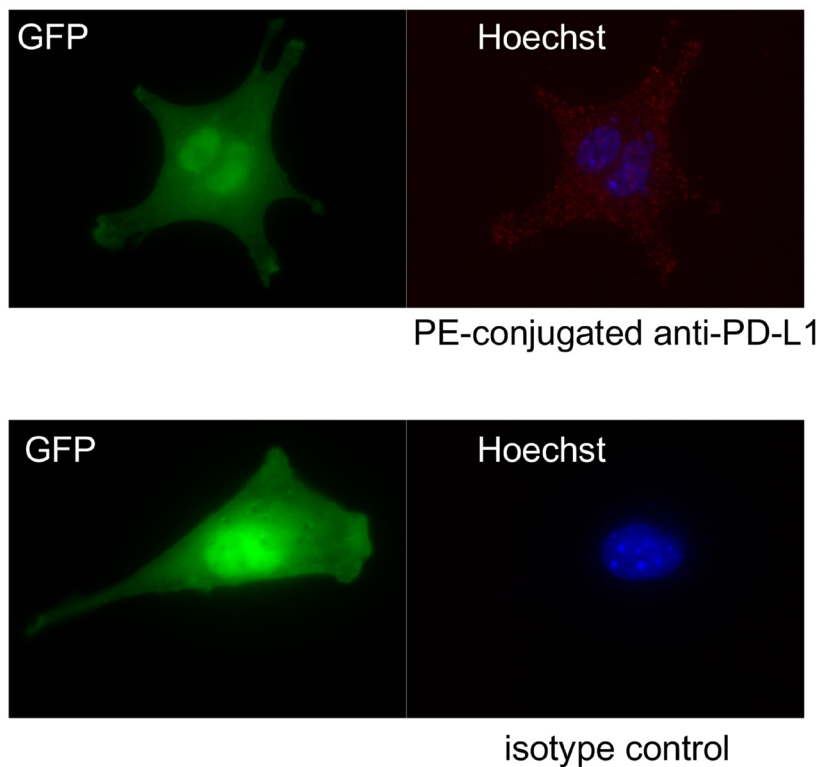

B

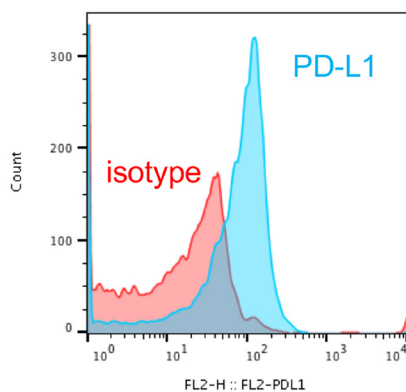

**Supplementary Figure 1: SL4 cells express PD-L1.** SL4 cells were stained with PE-conjugated anti-PD-L1 antibody (Ab; BioLegend, San Diego, CA, USA, 124308). Merged images with nuclear staining based on Hoechst 33342 (Dojindo, Chiba, Japan, 346-07951) are shown. The pictures shown are representative of at least four independent experiments (A). SL4 cells were stained by PE-conjugated anti-PD-L1 Ab (BioLegend) and isotype control. The expression levels of PD-L1 were analyzed by FACS (B).

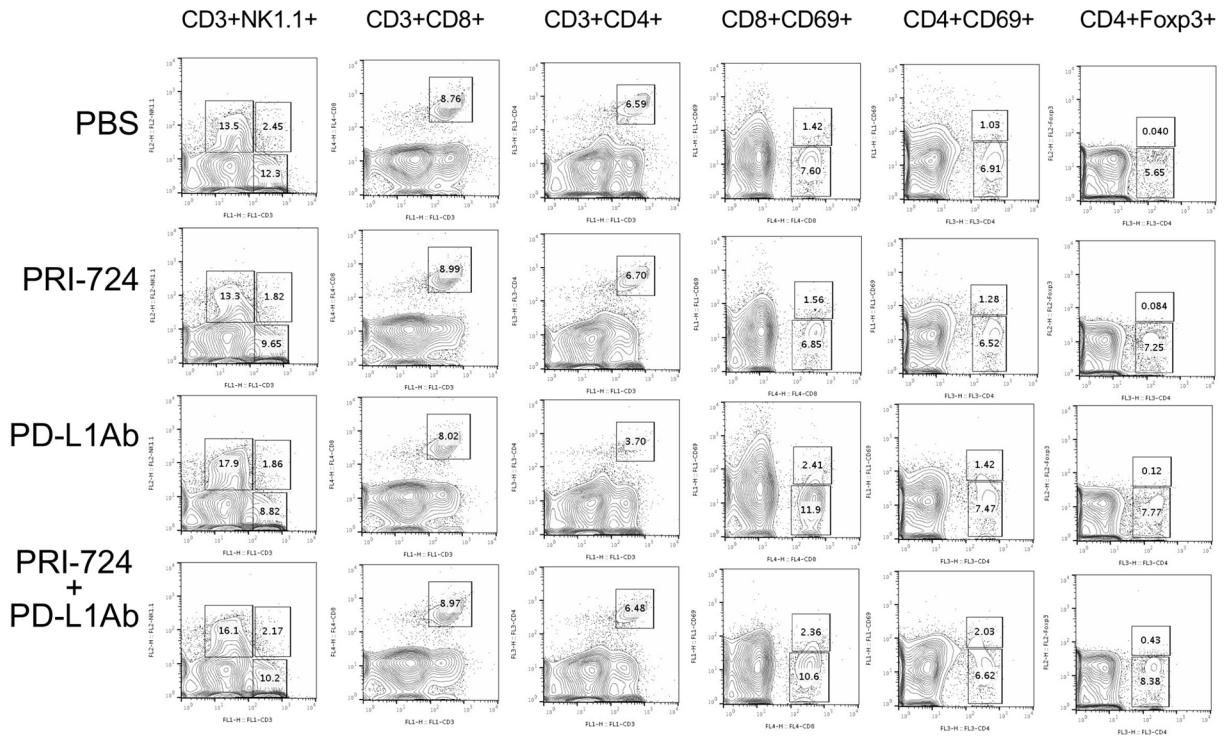

**Supplementary Figure 2: Changes in lymphocyte surface marker profiles in mice inoculated with SL4 cells.** After male C57BL/6J mice were intrasplenically injected with SL4 cells ( $5 \times 10^5$  cells) and treated with PRI-724 (0.4 mg/mouse) three times per week or an anti-PD-L1 antibody (200  $\mu$ g/mouse) three times per week, intrahepatic leukocytes (IHLs) were isolated from the liver median lobe. The expression of the indicated cell-surface markers was determined by FACS analysis.

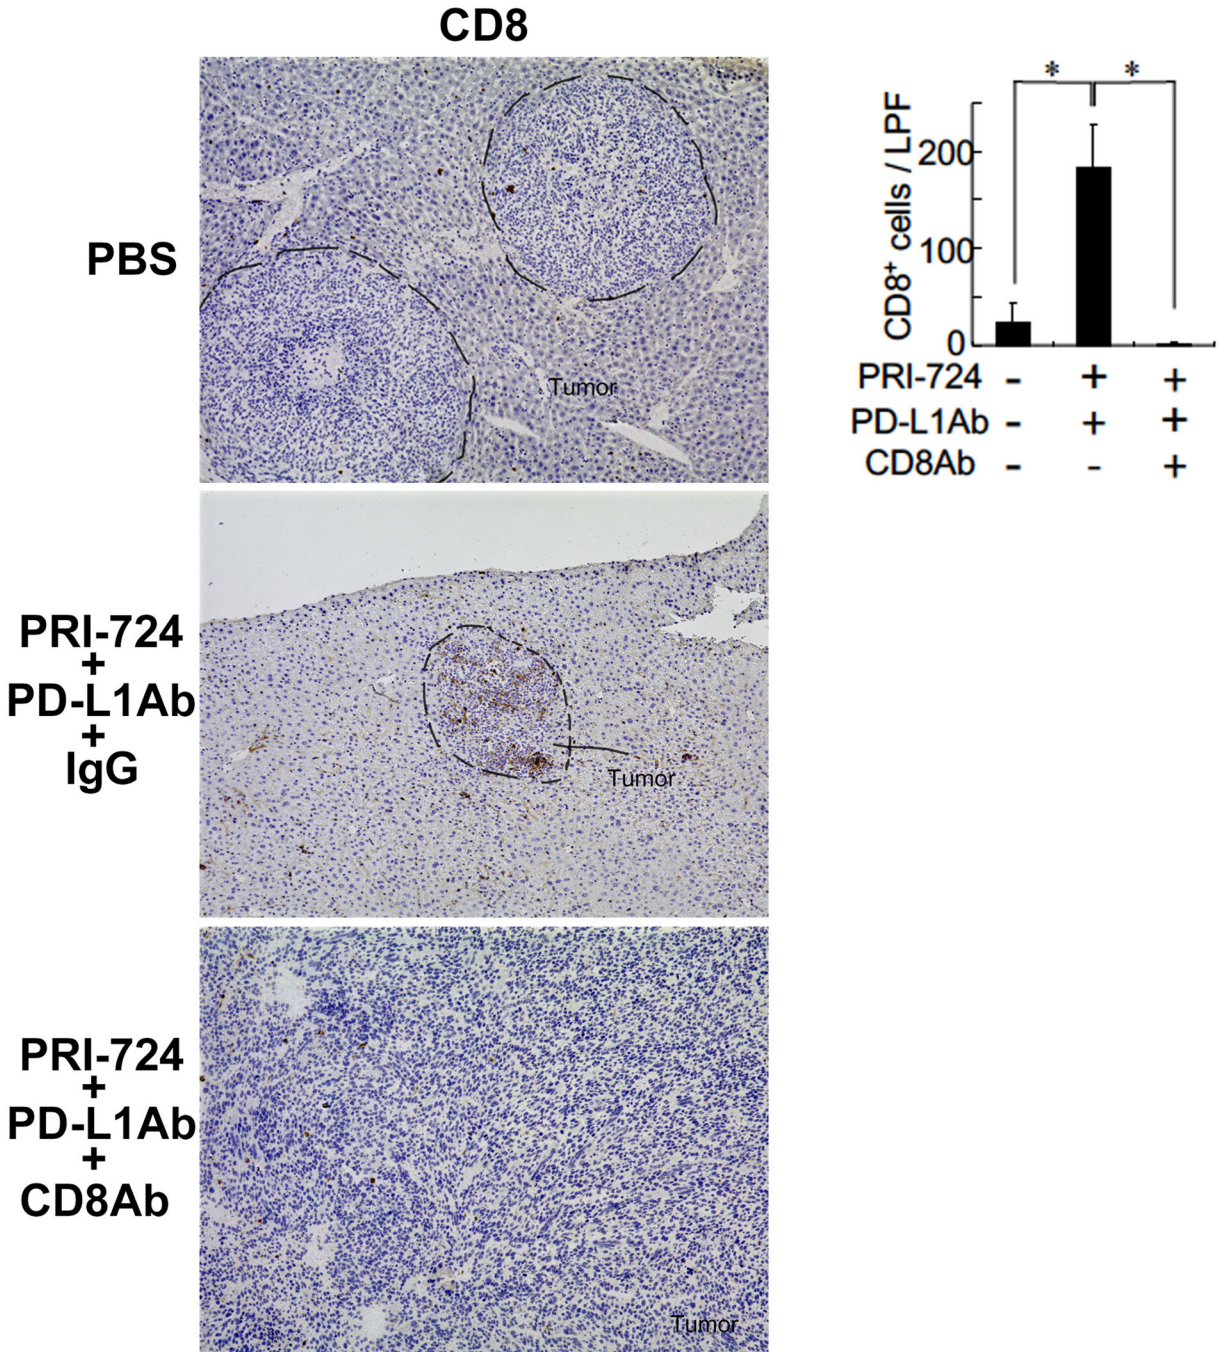

**Supplementary Figure 3: Anti-CD8 antibody (Ab) eliminated CD8<sup>+</sup> T lymphocytes infiltration to the metastatic tumor in the liver.** Male C57BL/6J mice were intrasplenically injected with SL4 cells ( $5 \times 10^5$  cells). The animals were treated with anti-PD-L1 Ab and PRI-724 in conjunction with or without anti-CD8 Ab and were humanely killed 14 d after inoculation. Expression of CD8 in the metastatic tumor was examined by immunohistochemistry with an anti-CD8 Ab (BD Biosciences, 553027) using the frozen sections to assess the number of CD8<sup>+</sup> lymphocytes (original magnification: 100 $\times$ ). The number of CD8<sup>+</sup> cells in the tumor was counted and adjusted according to the tumor area in the field (100 $\times$ ) (graph on left panel). \* $P < 0.05$  using a one-way ANOVA test.

**Supplementary Table 1: Changes in the profiles of serum cytokines and chemokines in SL4-inoculated mice**

| (pg/mL)       | SL4         |              |               |                 |
|---------------|-------------|--------------|---------------|-----------------|
|               | PBS         | PRI-724      | PBS           | PRI-724         |
| G-CSF         | 697 ± 254   | 1074 ± 380   | 1611 ± 1259   | 2089 ± 1236     |
| CCL11         | 631 ± 224   | 1100 ± 178   | 354 ± 189     | 422 ± 288       |
| GM-CSF        | 17.9 ± 4.6  | 27.6 ± 3.1   | 12.3 ± 16.9   | 13.3 ± 5.5      |
| IFN- $\gamma$ | 0.73 ± 0.70 | 2.17 ± 2.33  | 1.04 ± 1.59   | 1.53 ± 1.83     |
| IL-1a         | 283 ± 117   | 333 ± 34     | 134 ± 98      | 97 ± 59         |
| IL-1b         | 14.0 ± 6.4  | 21.5 ± 4.1   | 16.4 ± 6.3    | 19.6 ± 5.7      |
| IL-2          | 0.80 ± 0.63 | 2.69 ± 0.58  | 1.60 ± 1.37   | 1.61 ± 0.88     |
| IL-4          | N. D.       | N. D.        | 2.32 ± 1.91   | 2.39 ± 1.26     |
| IL-3          | N. D.       | N. D.        | N. D.         | N. D.           |
| IL-5          | 5.75 ± 1.93 | 9.64 ± 1.87  | 32.7 ± 27.5   | 70.83 ± 52.5*   |
| IL-6          | 10.2 ± 3.0  | 176.6 ± 59.3 | 67.4 ± 50.4   | 88.7 ± 46.9     |
| IL-7          | 1.18 ± 2.04 | 5.11 ± 6.21  | 9.21 ± 34.44  | 0.52 ± 1.48     |
| IL-9          | 249 ± 41    | 239 ± 21     | 290 ± 134     | 395 ± 456       |
| IL-10         | 6.2 ± 2.9   | 13.9 ± 4.0   | 30.2 ± 23.4   | 39.8 ± 11.9     |
| IL-12p40      | 9.7 ± 1.6   | 12.6 ± 2.9   | 3.8 ± 2.8     | 4.6 ± 3.1       |
| IL-12p70      | 14.8 ± 2.8  | 13.4 ± 7.2   | 8.0 ± 7.1     | 13.5 ± 6.8      |
| LIF           | 1.86 ± 0.19 | 4.40 ± 2.03  | 5.27 ± 2.61   | 6.86 ± 3.55     |
| IL-13         | 127 ± 29    | 153 ± 23     | 113 ± 30      | 112 ± 28        |
| CXCL5         | 9421 ± 1322 | 10631 ± 1041 | 4510 ± 2440   | 3012 ± 2845     |
| IL-15         | 63.6 ± 38.2 | 72.1 ± 18.7  | 14.1 ± 24.8   | 5.7 ± 10.7      |
| IL-17         | 6.40 ± 0.47 | 8.23 ± 2.35  | 3.12 ± 1.94   | 2.88 ± 1.98     |
| CXCL10        | 295 ± 68    | 287 ± 44     | 307 ± 65      | 444 ± 115*      |
| CXCL1         | 154 ± 57    | 2390 ± 874   | 467 ± 411     | 377 ± 165       |
| CCL2          | 57.6 ± 13.7 | 111.9 ± 30.5 | 67.5 ± 28.6   | 87.1 ± 18.5     |
| CCL3          | 78.5 ± 10.3 | 86.9 ± 5.1   | 54.2 ± 30.0   | 68.3 ± 16.3     |
| CCL4          | 62.0 ± 3.1  | 99.5 ± 15.3  | 41.5 ± 25.3   | 53.0 ± 21.9     |
| M-CSF         | 16.8 ± 2.0  | 21.2 ± 4.0   | 11.6 ± 4.1    | 15.9 ± 3.4*     |
| CXCL2         | 171 ± 8     | 211 ± 28     | 101 ± 93      | 93 ± 24         |
| CXCL9         | 55.5 ± 7.8  | 55.7 ± 12.1  | 557.4 ± 217.8 | 1160.5 ± 672.3* |
| CCL5          | 29.8 ± 4.8  | 35.6 ± 12.7  | 21.4 ± 8.3    | 25.5 ± 9.4      |
| VEGF          | 2.91 ± 0.23 | 2.90 ± 0.23  | 2.86 ± 0.66   | 3.11 ± 1.00     |
| TNF- $\alpha$ | 6.83 ± 1.45 | 11.49 ± 2.62 | 6.85 ± 2.06   | 10.06 ± 2.02*   |

After C57BL/6J male mice had been intrasplenically injected with SL4 ( $5 \times 10^5$  cells) and were treated with PRI-724 (0.4 mg/mouse, three times a week) or PBS, the animals were humanely killed 14 days after inoculation. Serum cytokines and chemokines were determined by MILLIPLEX. Results are presented as means  $\pm$  SD of data collected from at least 4 independent experiments. \* $P < 0.05$  versus SL4-inoculated PBS-treated mice using a 2-tailed Student's  $t$ -test. N.D.: not detected.

**Supplementary Table 2: Changes in the mRNA profiles of chemokines and cytokines in SL cells**

|        | DMSO            | 1 $\mu$ M C-82   |
|--------|-----------------|------------------|
| ATF3   | 1.00 $\pm$ 0.09 | 0.40 $\pm$ 0.01* |
| CCL2   |                 | Low expression   |
| CCL3   |                 | Low expression   |
| CCL4   |                 | Low expression   |
| CCL5   |                 | Low expression   |
| CCL7   |                 | Low expression   |
| CCL8   |                 | Low expression   |
| CXCL1  |                 | Low expression   |
| CXCL2  |                 | Low expression   |
| CXCL3  |                 | Low expression   |
| CXCL9  |                 | Low expression   |
| CXCL10 | 1.00 $\pm$ 0.27 | 0.99 $\pm$ 0.04  |
| CXCL12 | 1.00 $\pm$ 0.16 | 2.06 $\pm$ 0.11* |
| CXCL13 | 1.00 $\pm$ 0.22 | 0.51 $\pm$ 0.05* |

SL4 cells were treated with or without C-82 (1  $\mu$ M) for 24 hours. Expression of the indicated mRNA variants was determined by quantitative real-time RT-PCR. Results are presented as means  $\pm$  SD of data collected from at least 4 independent experiments. \* $P$  < 0.05 versus DMSO-treated cells using a 2-tailed Student's  $t$ -test. Low expression; the mRNA expression level in SL4 cells was below one fifth of that in SL4 inoculated liver.

**Supplementary Table 3: Changes in the mRNA profiles of chemokines and cytokines in PRI-724-treated liver**

|        | PBS             | PRI-724          |
|--------|-----------------|------------------|
| CCL2   | 1.00 $\pm$ 0.69 | 1.49 $\pm$ 0.49  |
| CCL3   | 1.00 $\pm$ 0.46 | 2.35 $\pm$ 0.16* |
| CCL4   | 1.00 $\pm$ 0.35 | 1.94 $\pm$ 0.26* |
| CCL5   | 1.00 $\pm$ 0.55 | 1.21 $\pm$ 0.23  |
| CCL7   | 1.00 $\pm$ 0.72 | 0.76 $\pm$ 0.36  |
| CCL8   | 1.00 $\pm$ 0.55 | 2.84 $\pm$ 2.11  |
| CXCL1  | 1.00 $\pm$ 0.72 | 0.60 $\pm$ 0.11  |
| CXCL2  | 1.00 $\pm$ 0.67 | 2.40 $\pm$ 0.65* |
| CXCL3  | 1.00 $\pm$ 0.58 | 2.79 $\pm$ 0.85* |
| CXCL9  | 1.00 $\pm$ 0.65 | 0.91 $\pm$ 0.60  |
| CXCL10 | 1.00 $\pm$ 0.38 | 0.88 $\pm$ 0.29  |
| CXCL12 | 1.00 $\pm$ 0.40 | 0.80 $\pm$ 0.31  |
| CXCL13 | 1.00 $\pm$ 0.48 | 0.58 $\pm$ 0.35  |

C57BL/6J male mice were treated with or without PRI-724 (0.4 mg/mouse, three times a week) for one week. The expression of the indicated mRNA variants in the isolated IHLs was determined by quantitative real-time RT-PCR. Data are mean  $\pm$  SD from at least 3 independent experiments. \* $P$  < 0.05 using a 2-tailed Student's  $t$ -test.



**Supplementary Table 4: Primer sequences used for quantitative real-time RT-PCR**

|                  | <b>Forward sequence</b>  | <b>Reverse sequence</b>  |
|------------------|--------------------------|--------------------------|
| ATF3             | AAGACAGAGTGCCTGCAGAA     | GTGCCACCTCTGCTTAGCTC     |
| CCL-2            | ATTGGGATCATCTTGCTGGT     | CCTGCTGTTACAGTTGCC       |
| CCL-3            | GTGGAATCTTCCGGCTGTAG     | ACCATGACACTCTGCAACCA     |
| CCL-4            | GAAACAGCAGGAAGTGGGAG     | CATGAAGCTCTGCGTGTCTG     |
| CCL-5            | CCACTTCTTCTCTGGGTTGG     | GTGCCCACGTCAAGGAGTAT     |
| CCL-7            | CCTGGGAAGCTGTTATCTTCAA   | TGGAGTTGGGGTTTTTCATGTC   |
| CCL-8            | GAAGGGGGATCTTCAGCTTT     | TCTTTGCCTGCTGCTCATAG     |
| CXCL-1           | TCTCCGTTACTTGGGGACAC     | CCACACTCAAGAATGGTCGC     |
| CXCL-2           | TCCAGGTCAGTTAGCCTTGC     | CGGTCAAAAAGTTTGCCTTG     |
| CXCL-3           | CAGCCACACTCCAGCCTA       | CACAACAGCCCCTGTAGC       |
| CXCL-9           | CGGACTTCACTCCAACACAG     | TAGGGTTCTCGAACTCCAC      |
| CXCL-10          | CCTATGGCCCTCATTCTCAC     | CTCATCCTGCTGGGTCTGAG     |
| CXCL-12          | TGCACGGCTGAAGAACAACAACAG | TCACACCTCTCACATCTTGAGCCT |
| CXCL-13          | CAGGCCACGGTATTCTGGA      | CAGGGGGCGTAACTTGAATC     |
| CD11c            | ACACAGTGTGCTCCAGTATGA    | GCCCAGGGATATGTTACAGC     |
| IFN- $\gamma$    | TGAGCTCATTGAATGCTTGG     | ACAGCAAGGCGAAAAAGGAT     |
| CD163            | TCCACACGTCCAGAACAGTC     | CCTTGAAACAGAGACAGGC      |
| Mannose receptor | TCTTGGGTCGGATGATTCTG     | GCCTGCTCTTCTCTGACCT      |
| IL-10            | GCTCTTACTGACTGGCATGAG    | CGCAGCTCTAGGAGCATGTG     |
